# Supplementary material
Source: publisher figshare collection journal article supplement (https://sage.figshare.com/ndownloader/files/14870168)

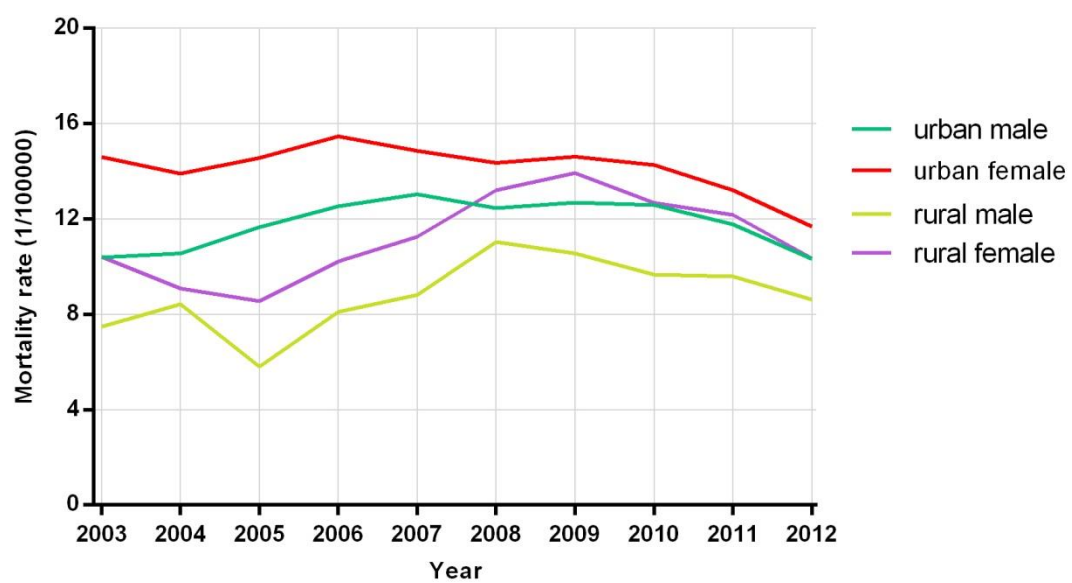

Appendix A. Trends by region and gender age standardized mortality of diabetes in China, 2003-2012.

Supplement: Supplementary file 1 [file 14870168]
